# Supplementary material for: Levosimendan increases the phosphorylation state of phospholamban in the isolated human atrium
Source: PubMed Central journal article supplement (PMC10042762; doi:10.1007/s00210-022-02348-7), 2022-11-29
Supplement: 210_2022_2348_MOESM1_ESM.pdf [file 210_2022_2348_MOESM1_ESM.pdf]

# Original Western blots

## 1. Ponceau red staining

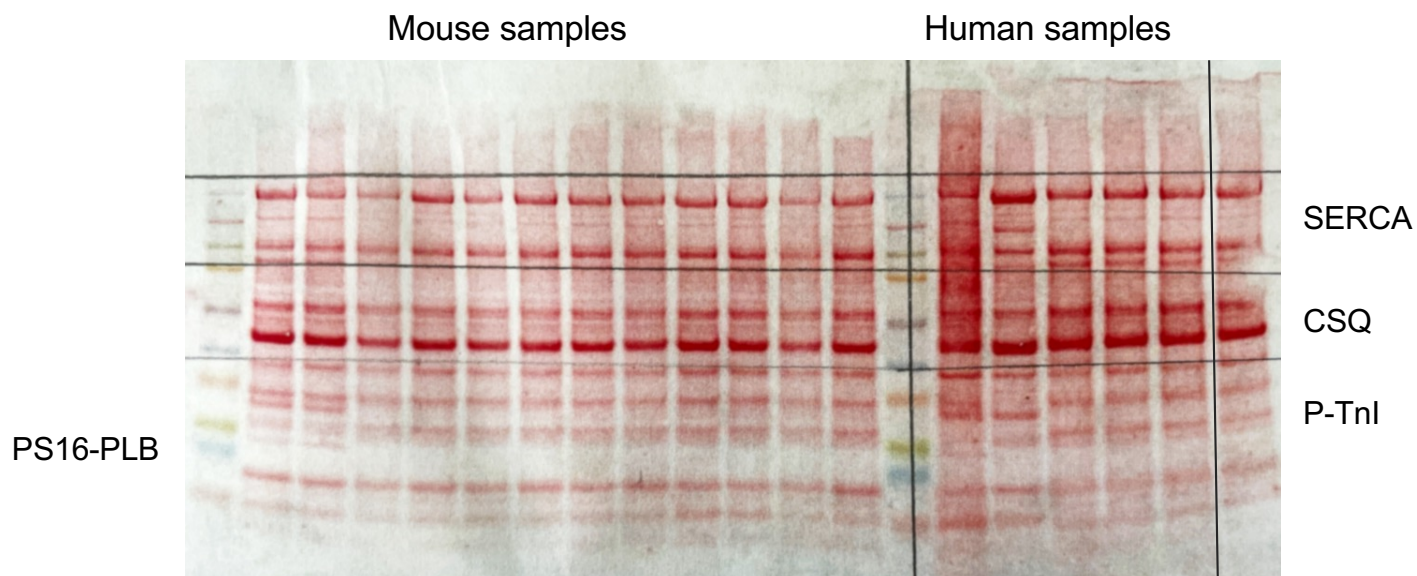

The lines on the ponceau stained blot show where the membrane was cutted before antibody incubation.

## 2. Immunoblotting (in order to save money, only the regions of interest were incubated with antibodies)

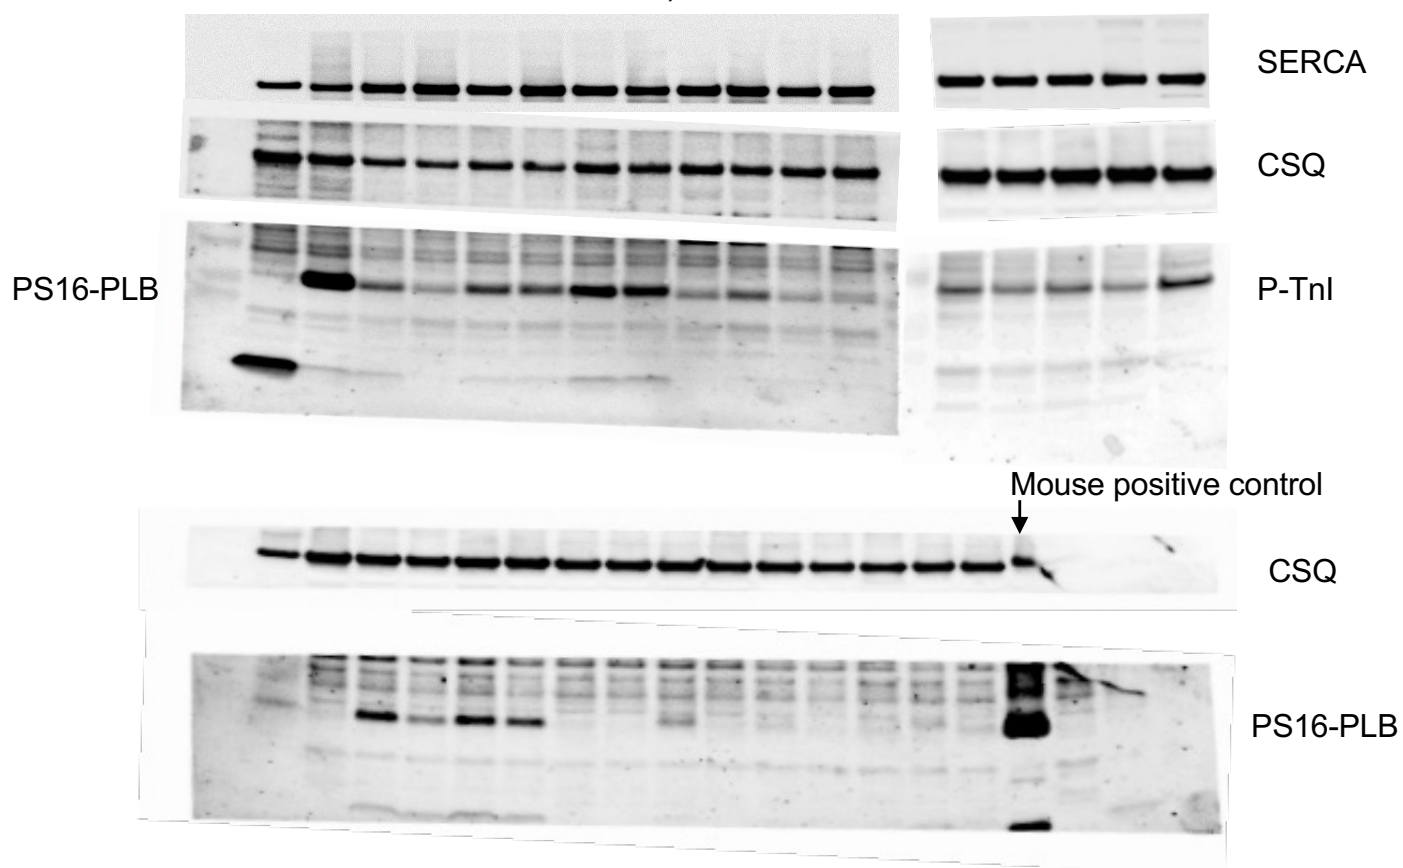

For the human PS16-PLB blot, the very same samples together with new samples and controls were run on a different gel.
